# Supplementary material
Source: publisher site journal article supplement (https://www.dovepress.com/article/410653)
Supplement: Supplementary file 1 [file get_supplementary_file.php]

**Supplementary Material**

**Effective attenuation of arteriosclerosis following lymphatic target delivery Hyaluronic acid-decorated Rapamycin liposomes**

**Xiaojia Liu1, Caiyan Lin2 3, Wenfei Zhong2 3, Zhongwen Yuan2 3, Pengke Yan2 3 *, Shixia Guan1 ***

**Affiliations**

1School of Pharmaceutical Sciences, Guangzhou University of Chinese Medicine, Guangzhou, China.

2Department of Pharmacy, The Third Affiliated Hospital of Guangzhou Medical University, Guangzhou, China.

3 Key Laboratory of Major Obstetric Diseases of Guangdong Province, Guangzhou Medical University, Guangzhou, China.

***Corresponding Authors**

Pengke Yan, Shixia Guan.

**S.1. Materials**

Coumarin 6 was purchased from TCI (Japan). DIR was purchased from Shanghai Yuanye Biotechnology Co.,Ltd. Fetal bovine serum (FBS) was purchased from Gibco (Thermo Fisher Scientific, USA).HA-DPOPE was commissioned for synthesis by AVT (Shanghai) Pharmaceutical Tech Co.,Ltd.Roxithromycin was purchased from Meilunbio Co., Ltd.All other chemicals were of analytical grade and used as received.

**S.2. Cell Culture**

The line of Human Lymphatic endothelial cells was chosen for biological experiment.Cells were cultured in Dulbecco’s modified Eagle’s medium (DMEM) supplemented with 10% fetal bovine serum (FBS),100 U/mL penicillin,and 100 µg/mL streptomycin (all reagents from Euroclone, Milan, Italy). Cells were seeded at 2.5 × 104 cells/cm2 and left in an incubator at 37 ◦C, with 5% CO2.

**S.3. Determination of the trapping rate**

Dialysis methods are not feasible for removing the unincorporated drug due to the water-insoluble property of RAPA ,which exists as crystals. Thus,Filtration method,we used,to separate the liposomes and drug crystals that was retained.In brief ,the amount of RAPA was weighed in triplicate accurately, and 3 mL blank liposomes were added to obtain the liposome suspension with final concentrations of 3.2 mg/mL, 4.0 mg/mL, and 4.8 mg/mL. The above-mentioned liposome suspension was filtered through a 0.22um microporous filter membrane, and the RAPA content in the filtered liposome solution was determined. The trapping rate was calculated according to Equation.(2):

Trapping rate(%)= (Wt-Wf)/Wt× 100%

where Wt was the analyzed amount of total RAPA,and Wf was the analyzed amount of RAPA in the filtered liposome solution.

**S.4. Hyaluronic Acid Quantification**

HA quantification was quantified by the carbazole assay. For the test, the liposome with 0% HA were used as the “Control” to assess the interference of the phospholipid in the colorimetric assay.3 mL of a 25 mM solution of sodium tetraboratedecahydrate in 96% sulfuric acid (w/v) was added to each Liposomal dispersions, mixed, and heated at 100 °C for 10 min in a water bath. The samples were then cooled under running water for 15 min prior to adding 100 μL of a 0.125% (w/v)carbazole solution in ethanol. After mixing, samples were heated again at 100 °C for 10 min. Finally, after cooling to room temperature, the absorbance was read at 530 nm using a UV spectrophotometer.

**S.5. Fabrication of Coumarin 6/DIR-loaded liposomes**

Coumarin 6 or DIR-loaded liposomes were generated by emulsion-solvent evaporation and sonication method. Briefly, the oil phase (OP) was composed of 2 mg Coumarin 6 (or 4 mg DIR), 120 mg Phospholipid, dissolved in 2 mL dichloromethane.20 mg Cholesteryl sodium sulfate (SCS) was ultrasonic dispersed in the aqueous phase (AP) composed of 20 mL Tris-HCl (pH 7.5)，which contains 5% HA-DOPE(Phospholipid/ HA-DOPE,*w/w*). Firstly,mixed the OP with AP and sonicated at 200W for 2.5 min,the emulsion was transferred to a container, and the organic solvent was volatilized at 45℃ water bath. Then probe sonication was carried out for 3 min with ice-water bath. The unincorporated Coumarin 6 or DIR were removed by centrifugation and filtration through a 0.22 μm cellulose nitrate membrane, respectively. The concentrations of Coumarin 6 and DIR were determined by UV-VIS spectrophotometry. For Coumarin 6, the detection wavelength was 469 nm. For DIR, the detection wavelength was 743 nm. The concentration was estimated based on a calibration curve built using Coumarin 6 and DIR in the concentration range of 0.49～15.62 μg/mL,3.12～50.00 μg/mL,respectively. The encapsulation efficiency (EE) was calculated according to Equation. (1):

EE (%)=We /Wt× 100% (1)

where We was the analyzed amount of encapsulated Coumarin 6 or DIR in liposomes, and Wt was the analyzed amount of total Coumarin 6 or DIR.

**S.6. HPLC methods for in vitro quantitation of RAPA**

**Chromatographic conditions**

A C18 analytical column (4.6 mm×250 mm, 5 μm) was used for our detection; RAPA was well separated using optimized component solvent with Methanol/Acetonitrile/Water (43:40:17, v/v/v) as mobile phase at a flow rate of 1.0 mL/min with a run time of 20 minutes. Column temperature, 40℃; UV detection wavelength,278 nm; Injection volume: 10 μL.

**Stock,standard & sample solution preparation**

Primary stock solutions were prepared by accurately weighing the RAPA and dissolving it in methanol to achieve a final concentration of 1.00 mg/mL.The three different concentrations working solution of RAPA standards were prepared at 2.00 ,20.00,200.00 μg/mL for each species by diluting the primary stock solutions with methanol. 900 μL methanol was added to 100 μL liposome solution,and the liposome membrane was destroyed by vortexing and ultrasound, the supernatant was filtered through a 0.22 μm microporous filter membrane for detection.

**Linearity range, precision，reproducibility & recovery**

A linear concentration range were determined as follow，the RAPA standards were prepared at concentrations of 4.37, 8.75, 17.50, 35.00, 70.00, 140.00, 280.00, 560.00 and 1120.00 ng/ml. Standard solution (n = 3 for each concentration) prepared at three different concentrations (low: 2.00 μg/mL, medium: 20.00 μg/mL, high: 200.00 μg/mL) were used to determine intra and inter-day assay precision of RAPA， and the intra and inter-day assay precision was calculated by percent relative standard deviation (%RSD). Six aliquots of the same batch of RAPA liposome solution were used for reproducibility analysis, peak areas were determined, and RSD values were calculated. The peak area of RAPA standards at low, medium and high concentrations were detected, the measured value was obtained by standard curve and the recovery was calculated.

**Stability**

RAPA standards wad evaluated as room temperature stability, long-term freezing stability, and freeze-thaw stability. RAPA standards from three different concentrations were used to carry out the stability experiment.The samples were taken at room temperature and detected at predetermined times (0, 2, 4, 8, 12, and 24 h) to examine the Bench-top stability. Stability of long term freezing was evaluated by placing the samples at 4℃ and -20℃ for 30 days. Freeze–thaw stability was evaluated by taking the samples out of the freezer (-80◦C),then letting them thaw to room temperature and freezing the samples again. This was repeated three times.

**S.7. Bioanalytical LC–MS/MS methods for RAPA**

**LC–MS/MS analysis**

The analysis of RAPA was performed on an Thermo Fisher 1250 Pump (Thermo Fisher, USA). A C18 analytical column (Waters ACQUITY UPLC® BEH C18 Colum ,1.7μm, 2.1×50 mm, Waters Corp., Ireland) was used for detection with a C18 Security Guard cartridge (4 × 2.0 mm i.d.; Phenomenex, Torrance, CA). RAPA was well separated using optimized gradient elution with methanol/0.1% formic acid as mobile phase at a flow rate of 0.4 ml/min with a run time of 10 minutes. The gradient employed to obtain the conjugation profiles was as follows (mobile phase B: methanol): 0 min:70%, 2.5 min: 80%, 3.0 min: 95%, 5.0 min: 70%,

MS parameters: capillary voltage, +3500V; nebulizer pressure, 40 psi; drying gas, 9 L/min; drying gas temperature, 325°C; fragment voltage, 35 V; dwell time, 200 ms; scan mode, selective ion monitoring (SIM) with [M-H]+ for RAPA (m/z 936.47/408.59 CE 56V), and danazol (m/z 338.32/338.32, CE 5), respectively. LC-MS/MS data were obtained by Agilent ChemStation Software.

**Methodological evaluation**

A linear concentration range were determined in blood ,calibration standards (n = 3) in these matrice were prepared at 1.00,2.00, 5.00, 10.00, 20.00, 50.00, 100.00, 200.00,500.00, 1000.00 and 2000.00 ng/mL. The peak area ratio of RAPA/Roxi against the corresponding concentration of calibration standards to genarate the calibration curves. It was then subjected to regressions with 1/X weighting factor to obtain good accuracy and better curve fitting.

QC samples (n=3) prepared at three different concentrations (LQC: 0.5 ng/mL, MQC: 5.0 ng/mL, HQC: 50.0 ng/mL) were used to determine accuracy and precision. The Intra and inter-day accuracy was calculated as percent accuracy = ([calculated concentration]/[actual concentration] × 100). Intra and inter-day assay precision of QCs was calculated by percent relative standard deviation (%RSD).

RAPA standards from three different concentrations were evaluated as initial standards, room temperature stability, short-term and long-term stability, and freeze-thaw stability. The samples were taken at room temperature for 6 h to examine the Bench-top stability. Stability of short-term and long-term stability were evaluated by placing the samples at 4℃ for 7 daya ,and -20℃ for 30 days,respectively. Freeze–thaw stability was evaluated by taking the samples out of the freezer (-80◦C),then letting them thaw to room temperature and freezing the samples again,and repeated three times.


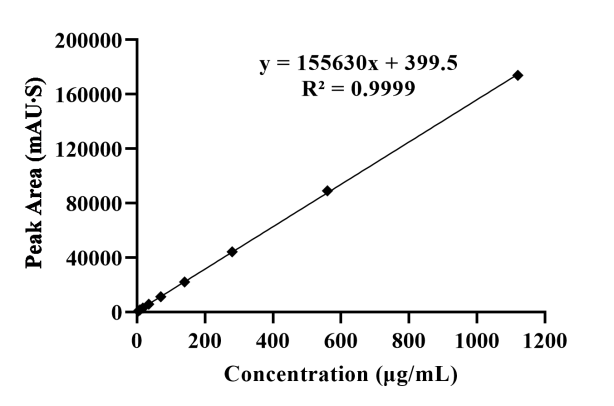


Fig 1S Standard curve of RAPA concentration versus peak area.

Table 1S Precision for determination of RAPAby HPLC (x ± s, n=5)

| Concentration  （μg/mL） | Intra-day | | Inter-day | |
| --- | --- | --- | --- | --- |
| Area（mAU∙S） | RSD% | Area（（mAU∙S） | RSD% |
| 2 | 494.56±5.56 | 1.12 | 508.46±9.33 | 1.84 |
| 20 | 4377.80±66.52 | 1.52 | 4378.05±107.51 | 2.46 |
| 200 | 40580.63±684.18 | 1.69 | 38945.81±1148.204 | 2.95 |

Table 2S Repeatability for determination of RAPAby HPLC (n=6)

| Number | Area（mAU∙S） | Mean±SD | RSD% |
| --- | --- | --- | --- |
| 1 | 18835.1 | 18413.85±306.96 | 1.67 |
| 2 | 18278.3 |
| 3 | 18584.8 |
| 4 | 18365.1 |
| 5 | 18493.2 |
| 6 | 17926.6 |

Table 3S The recovery of RAPA determined by HPLC (x ± s, n=3)

| Concentration（μg/mL） | Recovery % | RSD% |
| --- | --- | --- |
| 2 | 109.05±2.05 | 1.88 |
| 20 | 100.25±1.62 | 1.62 |
| 200 | 96.05±0.26 | 0.27 |

Table 4S The room temperature stability of RAPA determined

by HPLC（x ± s, n=3）

| Time/h | Area（mAU∙S） | | |
| --- | --- | --- | --- |
| 2μg/mL | 20μg/mL | 200μg/mL |
| 0 | 461.60±8.04 | 4357.70±44.47 | 36750.20±305.48 |
| 2 | 453.07±3.16 | 4287.13±27.61 | 35468.17±365.04 |
| 4 | 433.00±6.52 | 4505.67±91.56 | 35696.87±84.35 |
| 8 | 441.93±2.71 | 4349.97±21.18 | 35092.00±65.60 |
| 12 | 453.90±14.14 | 4436.73±67.02 | 35880.10±327.76 |
| 24 | 445.27±3.26 | 4350.33±17.32 | 35146.80±336.15 |
| Mean±SD | 446.97±10.89 | 4381.26±77.34 | 35672.36±609.95 |
| RSD% | 2.44 | 1.77 | 1.71 |

Table 5S The long term freezing stability of RAPA determined

by HPLC (x ± s, n=3)

| Concentration（μg/mL） | 4℃ | | -20℃ | |
| --- | --- | --- | --- | --- |
| Area（m AU∙S） | RSD% | Area（m AU∙S） | RSD% |
| 2 | 499.69±17.77 | 3.56 | 479.79±13.77 | 2.87 |
| 20 | 4343.88±105.68 | 2.43 | 4524.27±97.63 | 2.16 |
| 200 | 41158.79±1142.24 | 2.77 | 40545.73±1229.73 | 3.03 |

Table 6S The freeze-thaw cycle stability of RAPA determined

by HPLC (x ± s, n=3)

| Cycle index | Area（m AU∙S） | | |
| --- | --- | --- | --- |
| 2 μg/mL | 20 μg/mL | 200 μg/mL |
| 1 | 478.07±1.15 | 4140.60±23.07 | 37352.87±704.65 |
| 2 | 468.93±5.93 | 4140.97±25.96 | 36994.47±93.67 |
| 3 | 467.90±1.31 | 4288.20±64.25 | 36633.13±444.55 |
| Mean±SD | 471.63±5.60 | 4206.26±76.79 | 37019.65±298.45 |
| RSD% | 1.19 | 1.83 | 0.81 |

Table 7S Calibration curves for determination of RAPA in 3 different days in vessel walls.

| Cpd. |  | Calibration curves | *1/X* Weight | R2 |
| --- | --- | --- | --- | --- |
| RAPA | Day 1 | Y=0.0001x+0.0002 | Y=0.000001x+0.0001 | 0.9998 |
| Day 2 | Y=0.0001x+0.0002 | Y=0.0000005x+0.0001 | 0.9998 |
| Day 3 | Y=0.0001x+0.0002 | Y=0.000005x+0.0001 | 0.9996 |

Table 8S Accuracy and precision of UPLC-MS/MS method (n=3, ±s)

| Conc.  (ng.mL-1) | Intra-day | | Inter-day | |
| --- | --- | --- | --- | --- |
| Accuracy(%) | Precision (%) | Accuracy(%) | Precision (%) |
| 0.5 | 110.92±3.25 | 2.93 | 110.03±3.74 | 3.40 |
| 5.0 | 108.09±3.35 | 3.10 | 107.07±4.61 | 4.31 |
| 50.0 | 103.62±6.45 | 6.23 | 101.89±5.76 | 5.65 |

Table 9S Stability results for determination of RAPA in blood vessel. (n = 3)

| Conc.  (ng.mL-1) | Stability | | | | |
| --- | --- | --- | --- | --- | --- |
| Initiala | RTb | Short-termb | Long-termb | Freeze-thawb |
| 0.5 | 0.50±0.02 | 0.54±0.03 | 0.55±0.02 | 0.48±0.01 | 0.52±0.02 |
| 5.0 | 5.17±0.34 | 5.34±0.22 | 5.40±0.17 | 4.82±0.11 | 5.33±0.26 |
| 50.0 | 48.31±1.6 | 50.92±2.47 | 51.81±3.23 | 49.81±2.39 | 50.34±1.65 |

a. Freshly prepared quality control samples of RAPA. b.The treated RAPA samples placed at room temperature for 6 h, short-term, long-term, and triple freeze-thaw.

Table 10S The determination of the trapping rate（n=3）

| Added | Mean±SD（%） | RSD（%） |
| --- | --- | --- |
| 3.2 mg/ml | 99.66±0.040 | 0.040 |
| 4.0 mg/ml | 99.44±0.114 | 0.115 |
| 4.8 mg/ml | 99.31±0.179 | 0.181 |

Table 11S The determination of HA quantification by modified carbazole assay.

| Sample |  | Absorbance (*A*530) | | | Binding rate% |
| --- | --- | --- | --- | --- | --- |
| HA-RL | Free | 0.0517 | 0.0541 | 0.0563 | 93.37±0.58 |
| Binding | 0.6414 | 0.6425 | 0.6602 |
| Total | 0.6875 | 0.6921 | 0.7024 |
